# Supplementary material
Source: Springer Nature journal article supplement (https://www.springermedizin.de/resource/supplementary/12913_2010_1406_MOESM1_ESM.pdf/9528072)

The first stage

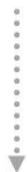

The second stage

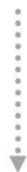

The third stage

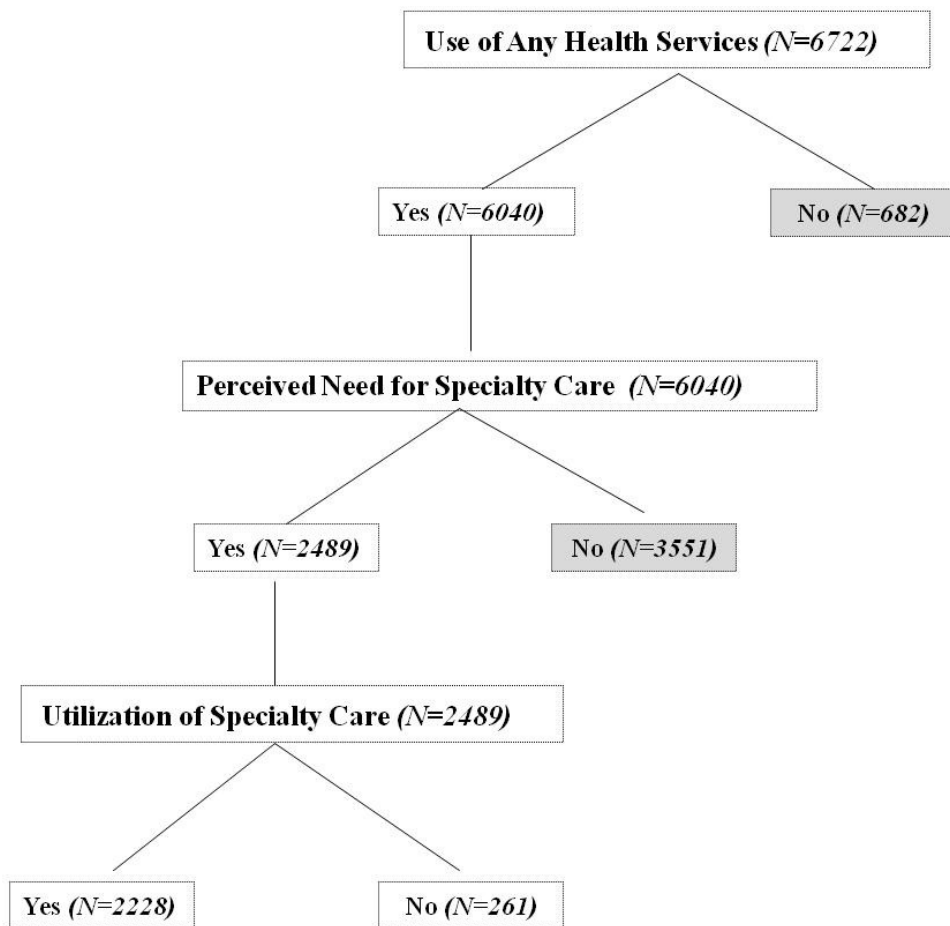

Supplement: MOESM1 [file 9528072]
